# Supplementary material
Source: publisher figshare collection journal article supplement (https://karger.figshare.com/ndownloader/files/22739990)
Supplement: Supplementary file 1 [file 22739990]

Figure E1 | The radar-charts display the ISU levels of four ISAC-tested patients having 4 distinct clinical pictures. Two radar-charts are shown for each patient, encompassing all the molecules evaluated in the ISAC test.

**Table E1** | Molecules directly (red) or inversely (green) associated with different clinical outcome
